# Supplementary material
Source: PubMed Central journal article supplement (PMC5928484)
Supplement: np7b01070_si_001.pdf [file np7b01070_si_001.pdf]

# **Estrogen Receptor (ER) Subtype Selectivity Identifies 8-Prenylapigenin as an ER $\beta$ Agonist from *Glycyrrhiza inflata* and Highlights the Importance of Chemical and Biological Authentication**

Atieh Hajirahimkhan,<sup>†‡</sup> Obinna Mbachu,<sup>†‡</sup> Charlotte Simmler,<sup>‡,§</sup> Sarah G. Ellis,<sup>‡</sup> Huali Dong,<sup>‡</sup> Dejan Nikolic,<sup>‡</sup> David C. Lankin,<sup>‡,§</sup> Richard B. van Breemen,<sup>‡,§</sup> Shao-Nong Chen,<sup>‡,§</sup> Guido F. Pauli,<sup>‡,§</sup> Birgit M. Dietz,<sup>‡</sup> and Judy L. Bolton<sup>\*,‡</sup>

<sup>‡</sup>UIC/NIH Center for Botanical Dietary Supplements Research and <sup>§</sup>Center for Natural Product Technologies (CENAPT), Department of Medicinal Chemistry and Pharmacognosy, College of Pharmacy, M/C 781, University of Illinois at Chicago, 833 South Wood Street, Chicago, Illinois 60612-7231, United States.

<sup>†</sup>These authors contributed equally to this publication.

## **Correspondence**

\*Prof. Dr. Judy Bolton, Distinguished Professor and Head, Department of Medicinal Chemistry and Pharmacognosy, College of Pharmacy, University of Illinois at Chicago, 833 South Wood St., M/C 781, Chicago, IL, 60612-7231, USA. E-mail: judy.bolton@uic.edu Phone: +1 312-996-5280 Fax: +1 312-996-7107

## SUPPORTING INFORMATION

**Note:** The raw and annotated NMR data, as well as the <sup>1</sup>H iterative full spin analysis (HiFSA) of 8-prenylapigenin (syn, licoflavone C), 4'-O-methylbavachalcone (= 4'-O-methylroussochalcone B) and its isomer (bavachinin), abyssinone II, as well as licochalcone C are made freely available via the Harvard Dataverse at [doi:10.7910/DVN/JZOL2U](https://doi.org/10.7910/DVN/JZOL2U)

## Table of Contents

|                                                                                                                                                      |           |
|------------------------------------------------------------------------------------------------------------------------------------------------------|-----------|
| Correspondence.....                                                                                                                                  | 1         |
| <b>S1. <sup>1</sup>H NMR and chromatographic analyses of fraction 8 (2.1% w/w crude GI extract).....</b>                                             | <b>4</b>  |
| a. Comparative <sup>1</sup> H NMR spectra of fractions 8 with its four major isolated compounds<br>4                                                 |           |
| b. Semi-preparative chromatogram of fraction 8 after NMR analysis .....                                                                              | 4         |
| <b>S2. Annotated <sup>1</sup>H/<sup>13</sup>C NMR and MS/MS spectra of 8-prenylapigenin (DMSO-<i>d</i><sub>6</sub>, 600 and 225MHz) .....</b>        | <b>5</b>  |
| a. Annotated <sup>1</sup> H NMR spectrum of verified 8-prenylapigenin.....                                                                           | 5         |
| b. Annotated <sup>13</sup> C NMR spectrum of verified 8-prenylapigenin .....                                                                         | 5         |
| c. <sup>1</sup> H and <sup>13</sup> C NMR data of 8-prenylapigenin (DMSO- <i>d</i> <sub>6</sub> , 600 MH, 225 MHz) .....                             | 6         |
| d. MS/MS spectrum of verified 8-prenylapigenin .....                                                                                                 | 6         |
| <b>S3. Annotated <sup>1</sup>H/ <sup>13</sup>C NMR and MS/MS spectra of 4'-O-methylbavachalcone claimed to be 8-prenylapigenin .....</b>             | <b>7</b>  |
| a. <sup>1</sup> H NMR spectra of the sample, acquired at a 2-year interval (DMSO- <i>d</i> <sub>6</sub> , 600 and 900MHz).....                       | 7         |
| b. Annotated <sup>13</sup> C NMR spectrum (225 MHz) of the 2-year sample containing mainly bavachinin (syn. bavachinin A, 7-O-methylbavachinin)..... | 8         |
| c. Annotated <sup>1</sup> H NMR spectrum of 4'-O-methylbavachalcone (DMSO- <i>d</i> <sub>6</sub> , 600 MHz).....                                     | 9         |
| d. Annotated <sup>1</sup> H NMR spectrum of bavachinin (DMSO- <i>d</i> <sub>6</sub> , 900 MHz).....                                                  | 10        |
| e. <sup>1</sup> H and <sup>13</sup> C NMR data of 4'-O-methylbavachalcone and its isomer (DMSO- <i>d</i> <sub>6</sub> , 600 MH, 225 MHz) .....       | 11        |
| f. LC-MS chromatogram of the sample received and MS/MS spectrum of 4'-O-methylbavachalcone.....                                                      | 12        |
| <b>S4. Annotated <sup>1</sup>H NMR spectrum of Abyssinone II (DMSO-<i>d</i><sub>6</sub>, 600 MHz).....</b>                                           | <b>13</b> |
| a. Annotated <sup>1</sup> H NMR spectra .....                                                                                                        | 13        |
| b. <sup>1</sup> H and <sup>13</sup> C NMR data (DMSO- <i>d</i> <sub>6</sub> , 600-225 MHz).....                                                      | 14        |
| <b>S5. Annotated <sup>1</sup>H NMR spectrum of licochalcone C (DMSO-<i>d</i><sub>6</sub>, 600 MHz) .....</b>                                         | <b>15</b> |
| a. Annotated <sup>1</sup> H NMR spectra .....                                                                                                        | 15        |
| b. <sup>1</sup> H and <sup>13</sup> C NMR data (DMSO- <i>d</i> <sub>6</sub> , 600-225 MHz).....                                                      | 16        |

**S1. <sup>1</sup>H NMR and chromatographic analyses of fraction 8 (2.1% w/w crude GI extract)**

**a. Comparative <sup>1</sup>H NMR spectra of fractions 8 with its four major isolated compounds**

Stacked NMR spectra (600MHz, DMSO-d<sub>6</sub>)

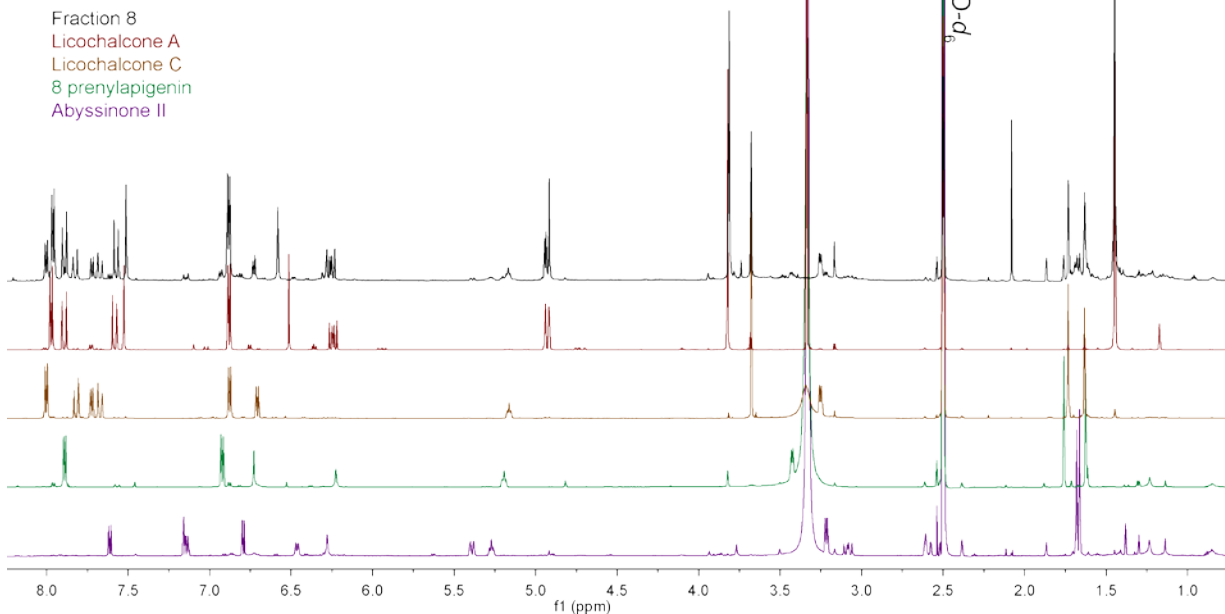

**b. Semi-preparative chromatogram of fraction 8 after NMR analysis**

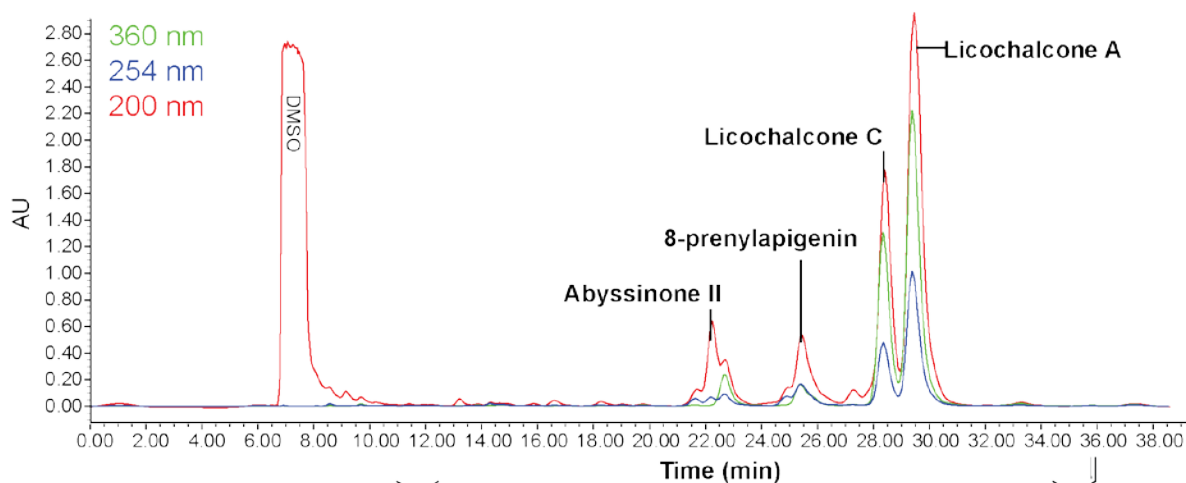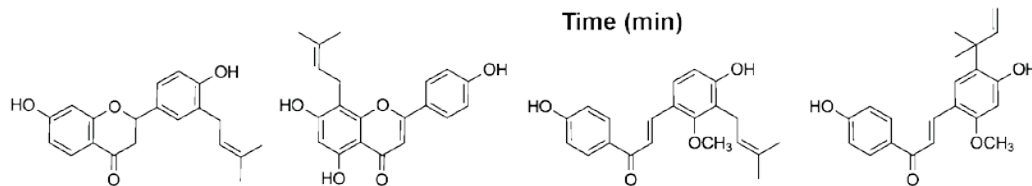

| Compound         | % w/w fr.8 |
|------------------|------------|
| Abyssinone II    | 4.4        |
| 8-prenylapigenin | 5.1        |
| Licochalcone C   | 25.5       |
| Licochalcone A   | 64.8       |

**Column:** YMC- Pack ODS AQ (1250 x10 mm ID, S-10 μm, 12 mm AQ12S11-251 OWT) **Gradient:** (B: Acetonitrile, A: Water) 58% B for 40 minutes in isocratic mode. Flow rate at 1.8 ml/min

Both the semi-preparative LC-UV chromatogram and the <sup>1</sup>H NMR spectrum indicated that Licochalcone A and licochalcone C are the most abundant compounds in fraction 8, whereas 8-prenylapigenin is a minor metabolite. Considering the known fraction yield (7.13 mg = 2.1% w/w extract), the proportion of 8-prenylapigenin in fraction 8 was estimated at 5.1% w/w, and, thus, the proportion of **8-prenylapigenin in the crude extract was estimated to be ~ 0.11% w/w.**



c. <sup>1</sup>H and <sup>13</sup>C NMR data of 8-prenylapigenin (DMSO-d<sub>6</sub>, 600 MHz, 225 MHz)

| 8-prenylapigenin (Licoflavone C) |       |                                                                                             |                |
|----------------------------------|-------|---------------------------------------------------------------------------------------------|----------------|
| Position                         | mult. | δ <sub>H</sub> (J in Hz)                                                                    | δ <sub>C</sub> |
| C=O                              |       |                                                                                             | 181.74         |
| 2                                |       |                                                                                             | 163.73         |
| 3                                | 1H    | 6.78, s                                                                                     | 102.72         |
| 5 (OH)                           |       | 12.85, s                                                                                    | 159.10         |
| 6                                |       | 6.28, s                                                                                     | 98.38          |
| 7                                |       |                                                                                             | 161.64         |
| 8                                |       |                                                                                             | 106.10         |
| 9                                |       |                                                                                             | 154.49         |
| 10                               |       |                                                                                             | 103.66         |
| 1'                               | 1H    |                                                                                             | 121.54         |
| 2'/6'                            | 2H    | 7.89 AA' type ( $J_{H2'/6'-H3'/5'} : 8.63/0.24$ , $J_{H2'/6'-H2'/6'} : 2.88$ )*             | 127.61         |
| 3'/5'                            | 2H    | 6.92 XX' type ( $J_{H2'/6'-H3'/5'} : 8.63/0.24$ , $J_{H3'/5'-H3'/5'} : 2.88$ )*             | 115.17         |
| 4'                               | 1H    |                                                                                             | 161.15         |
| 1''                              | 2H    | 3.42 d ( $J_{H2''-1''} : 7.039$ , $J_{H1''-4''} : 0.96$ , $J_{H1''-5''} : 0.73$ )*          | 22.06          |
| 2''                              | 1H    | 5.21 ddqq type ( $J_{H2''-1''} : 7.04$ , $J_{H2''-4''} : -1.57$ , $J_{H2''-5''} : -1.37$ )* | 122.56         |
| 3''                              |       |                                                                                             | 131.03         |
| 4'' CH <sub>3</sub>              | 3H    | 1.62 brs ( $J_{H1''-4''} : 0.96$ , $J_{H2''-4''} : -1.57$ )*                                | 25.47          |
| 5'' CH <sub>3</sub>              | 3H    | 1.75 brs ( $J_{H1''-5''} : 0.74$ , $J_{H2''-5''} : -1.37$ )*                                | 17.85          |
| 7'-OH                            |       | 10.78 brs                                                                                   |                |
| 4'-OH                            |       | 10.37 brs                                                                                   |                |

\*Calculated values obtained through full spin analysis using Perch NMR software, in order to obtain the exact coupling constants.

d. MS/MS spectrum of verified 8-prenylapigenin

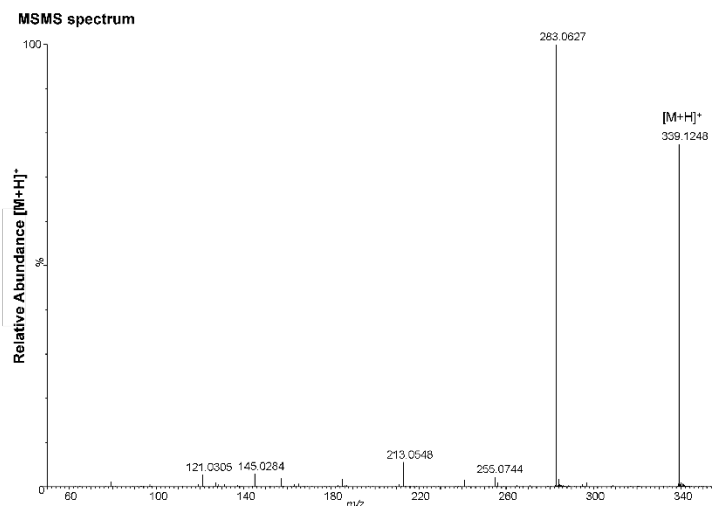

MS/MS spectrum of verified 8-prenylapigenin. The MS/MS spectrum was taken with a CE ramp between 6-50 eV in positive ionization mode.

**Synonym:** 8-prenylapigenin, licoflavone C

**CAS Registry Number:** 72357-31-4

**Pubchem CID:** 10246505

**Molecular Formula:** C<sub>20</sub>H<sub>18</sub>O<sub>5</sub>

**Chemspider ID:** 8421992

S3. Annotated  $^1\text{H}/^{13}\text{C}$  NMR and MS/MS spectra of 4'-O-methylbavachalcone claimed to be 8-prenylapigenin

a.  $^1\text{H}$  NMR spectra of the sample, acquired at a 2-year interval (DMSO- $d_6$ , 600 and 900MHz)

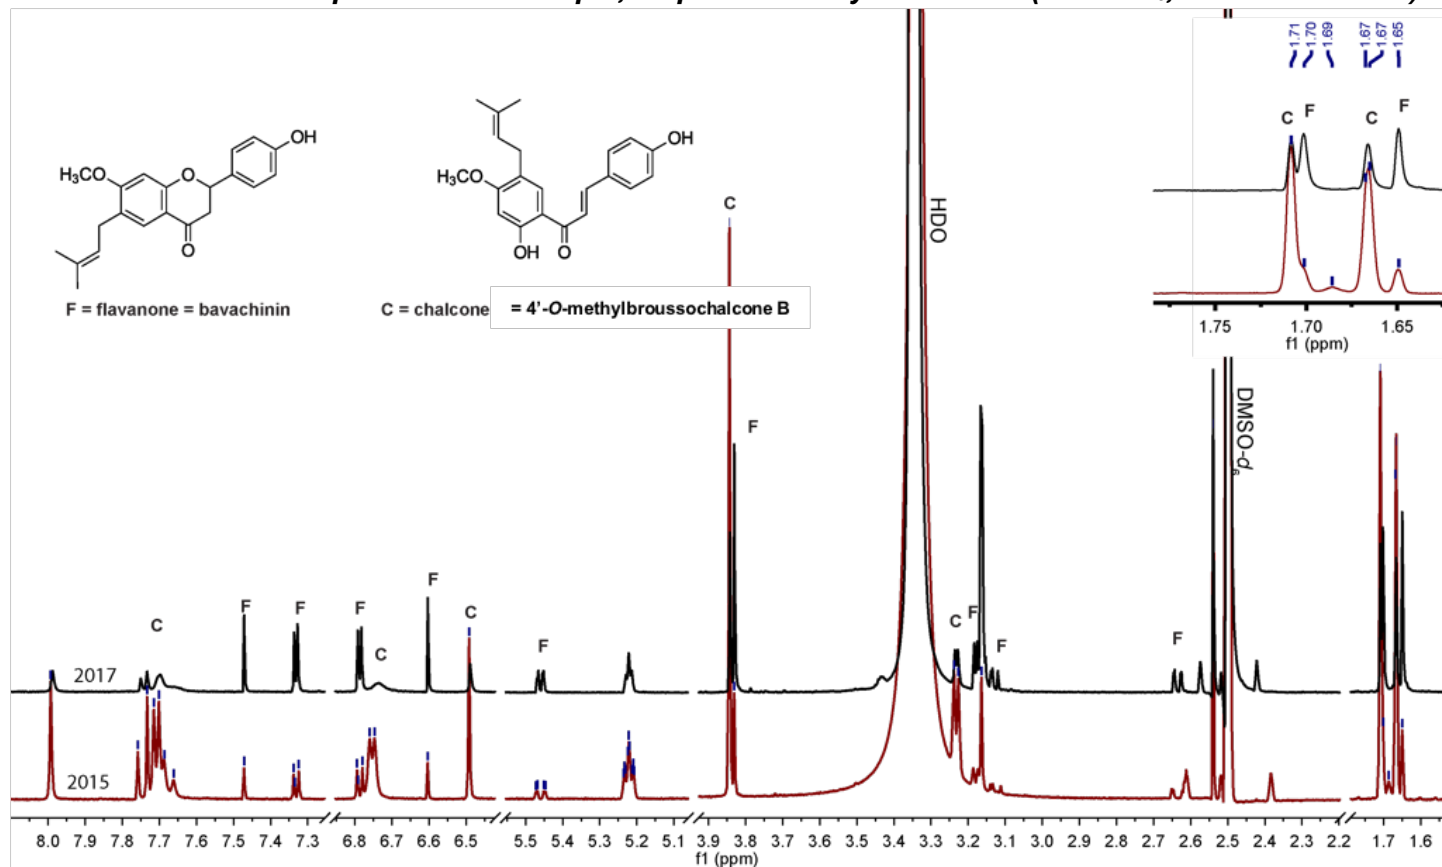

The results presented here clearly demonstrated the isomerization of the chalcone (C= 4'-O-methylbavachalcone or 4'-O-methylbrousochalcone B) into its flavanone isomer (F = bavachinin, bavachinin A or 7-O-methylbavachinin), occurring in the NMR tube. The  $^{13}\text{C}$  data was acquired using the 2 year-sample and, thus, reflect only the  $^{13}\text{C}$  resonances of the flavanone isomer

**b. Annotated  $^{13}\text{C}$  NMR spectrum (225 MHz) of the 2-year sample containing mainly bavachinin (syn. bavachinin A, 7-O-methylbavachinin)**

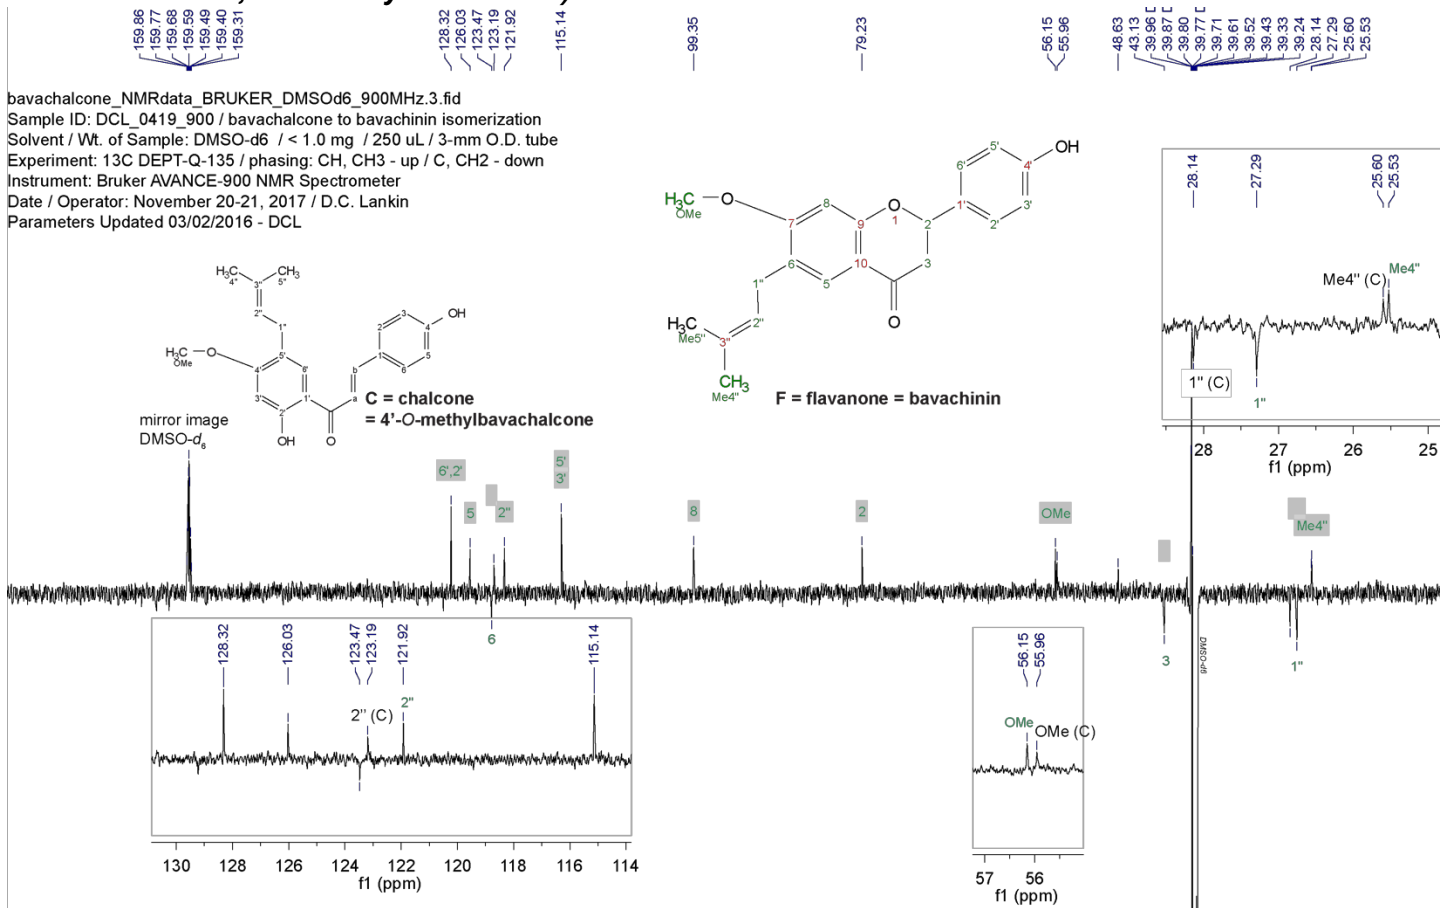



**c. Annotated <sup>1</sup>H NMR spectrum (DMSO-d<sub>6</sub>, 600 MHz) of 4'-O-methylbavachalcone (4'-O-methylbrousochalcone B)**

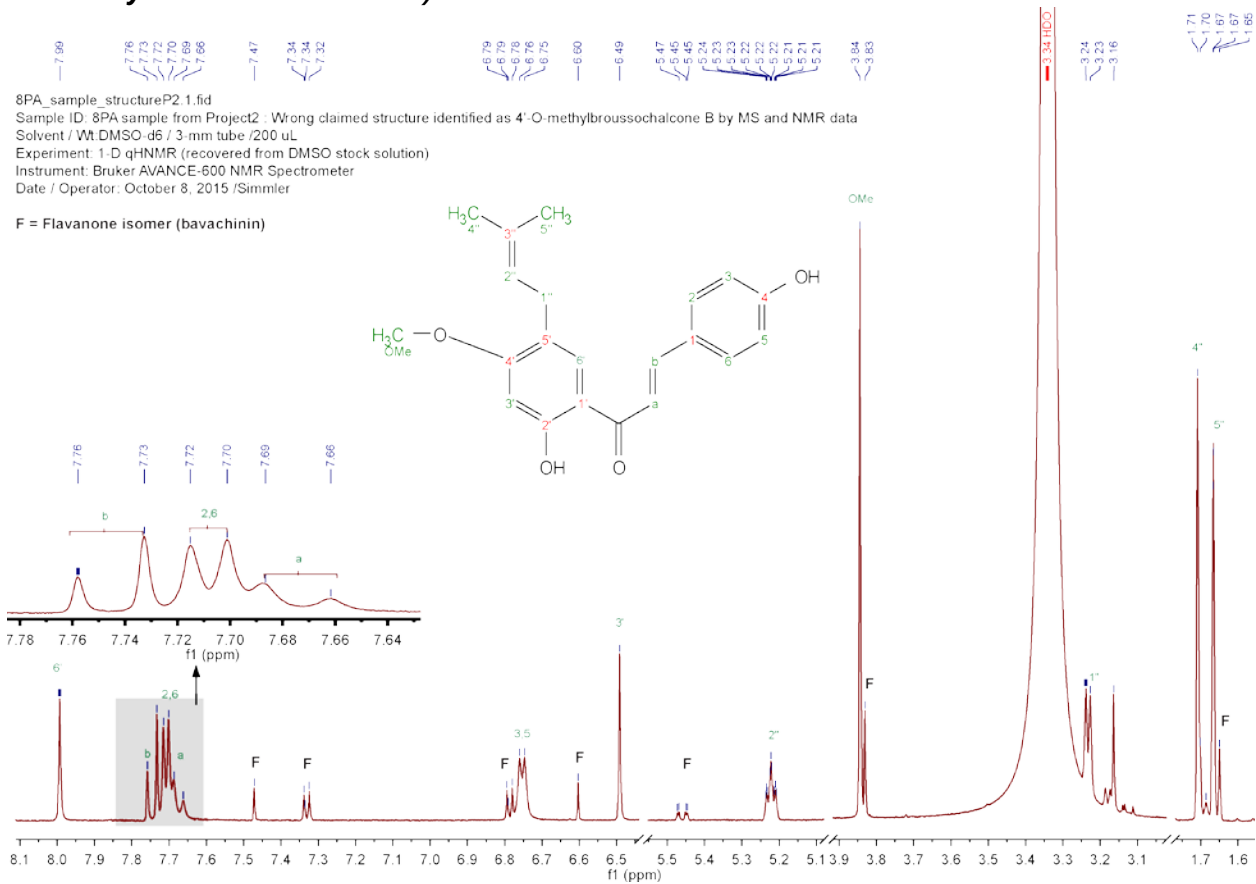

**d. Annotated  $^1\text{H}$  NMR spectrum of bavachinin (DMSO- $d_6$ , 900 MHz)**

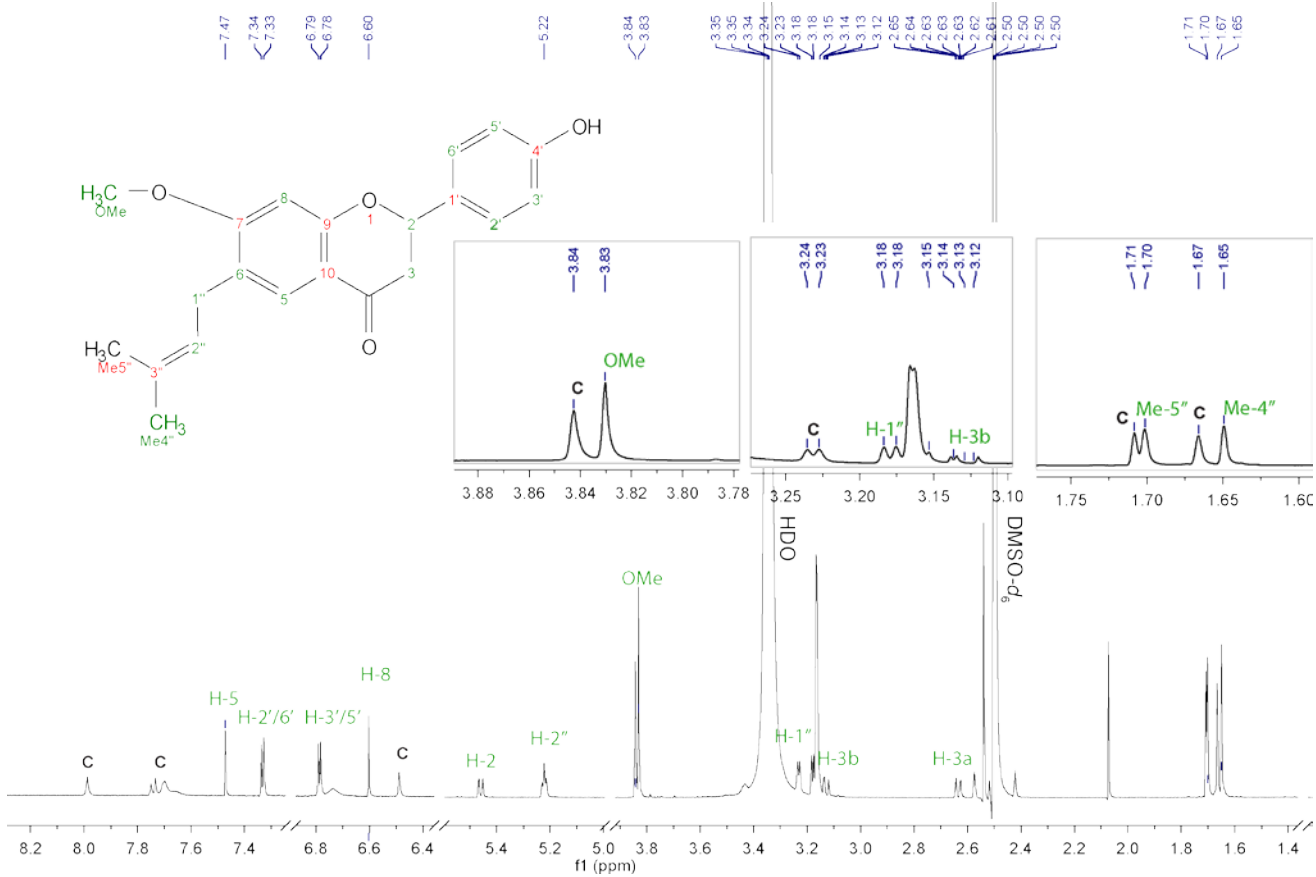

e. <sup>1</sup>H and <sup>13</sup>C NMR data of 4'-O-methylbavachalcone and its isomer (DMSO-d<sub>6</sub>, 600 MHz, 225 MHz)

| Pos.        | mult | 4'-O-methylbavachalcone                                                                   |              | Bavachinin (flavanone isomer )                                                             |              |
|-------------|------|-------------------------------------------------------------------------------------------|--------------|--------------------------------------------------------------------------------------------|--------------|
|             |      | $\delta_H$ (J in Hz)                                                                      | $\delta_C^a$ | $\delta_H$ (J in Hz)                                                                       | $\delta_C^b$ |
| C=O         | .    |                                                                                           | 191.90       |                                                                                            | nd           |
| 2           |      | <i>Not present</i>                                                                        |              | 5.45 <i>dd</i> ( $J_{3a-2}$ :13.13; $J_{3b-2}$ :2.84)*                                     | 79.19        |
| 3b          | 1H   |                                                                                           |              | 3.14, <i>dd</i> ( $J_{3a-3b}$ :-16.95; $J_{3b-2}$ :13.13)*                                 | 43.13        |
| 3a          | 1H   |                                                                                           |              | 2.63, <i>dd</i> ( $J_{3a-3b}$ :-16.95; $J_{3a-2}$ :2.84)*                                  |              |
| 3' (8)      | 1H   | 6.49, <i>s</i> ( $J_{H3'-6'}$ :0.92)                                                      | 99.14        | 6.61, <i>s</i> ( $J_{8-5}$ :0.006)                                                         | 99.14        |
| 4 (4')      |      |                                                                                           | nd           |                                                                                            | nd           |
| 5' (6)      |      |                                                                                           | 121.01       |                                                                                            | 123.47       |
| 6' (5)      |      | 7.99, <i>s</i> ( $J_{H3'-6'}$ :0.92)                                                      | 130.04       | 7.48, <i>s</i> ( $J_{H5-8}$ :0.006)                                                        | 125.95       |
| $\alpha$    | 1H   | 7.67, <i>d</i> ( $J_{H\alpha-\beta}$ :15.13)                                              |              | <i>Not present</i>                                                                         |              |
| $\beta$     | 1H   | 7.74, <i>d</i> ( $J_{H\alpha-\beta}$ :15.13)                                              |              | <i>Not present</i>                                                                         |              |
| 1' (10)     | 1H   |                                                                                           | 113.52       |                                                                                            | 114.17       |
| 2' (9)      |      |                                                                                           | 164.56       |                                                                                            | 162.29       |
| 2/6 (2'/6') | 2H   | 7.71 <i>AA'</i> ( $J_{H2/6-H3/5}$ :8.29/0.80, $J_{H2/6-H2/6}$ :1.69)*                     | 131.16       | 7.34 <i>AA'</i> ( $J_{H2'/6'-H3'/5'}$ :8.15/0.62, $J_{H2'/6'-H2'/6'}$ :1.71)*              | 128.29       |
| 3/5 (3'/5') | 2H   | 6.75 <i>XX</i> ( $J_{H2/6-H3/5}$ :8.63/0.24, $J_{H3/5-H3/5}$ :1.87)*                      | nd           | 6.79 <i>XX'</i> ( $J_{H2'/6'-H3'/5'}$ :8.15/0.62, $J_{H3'/5'-H3'/5'}$ :1.71)*              | 114.95       |
| 4' (7)      | 1H   |                                                                                           | 163.42       |                                                                                            | 164.13       |
| O-CH3       | 3H   | 3.84, <i>s</i>                                                                            | 56.03        | 3.83, <i>s</i>                                                                             | 56.03        |
| 1''         | 2H   | 3.23, <i>d</i> ( $J_{H2''-1''}$ :7.64, $J_{H1''-4''}$ :-0.80, $J_{H1''-5''}$ :0.64)*      | 28.56        | 3.18, <i>d</i> ( $J_{H2''-1''}$ :7.45, $J_{H1''-4''}$ :-0.34, $J_{H1''-5''}$ :0.79)*       | 27.29        |
| 2''         | 1H   | 5.22, <i>ddqq</i> ( $J_{H2''-1''}$ :7.64, $J_{H2''-4''}$ :-1.57, $J_{H2''-5''}$ : -1.34)* | 123.19       | 5.22, <i>ddqq</i> ( $J_{H2''-1''}$ :7.45, $J_{H2''-4''}$ : -1.39, $J_{H2''-5''}$ : -1.24)* | 121.92       |
| 3''         |      |                                                                                           | 131.13       |                                                                                            | 132.0        |
| 4'' CH3     | 3H   | 1.67, <i>brs</i> ( $J_{H1''-4''}$ :-0.80, $J_{H2''-4''}$ : -1.57)*                        | 26.01        | 1.65, <i>brs</i> ( $J_{H1''-4''}$ : -0.34, $J_{H2''-4''}$ : -1.39)*                        | 26.08        |
| 5'' CH3     | 3H   | 1.71, <i>brs</i> ( $J_{H1''-5''}$ :0.64, $J_{H2''-5''}$ : -1.37)*                         | 17.25        | 1.70, <i>brs</i> ( $J_{H1''-5''}$ :0.79, $J_{H2''-5''}$ : -1.23)*                          | 17.86        |

The numbers in brackets are related to bavachinin

\*Calculated values obtained through full spin analysis using Perch NMR software, in order to obtain the exact coupling constants.

nd=- not detected

<sup>a</sup>determined from the HMBC/HSQC data, <sup>b</sup> and <sup>13</sup>C data for bavachinin.

**f. LC-MS chromatogram of the sample received and MS/MS spectrum of 4'-O-methylbavachalcone**

LC-MS chromatogram

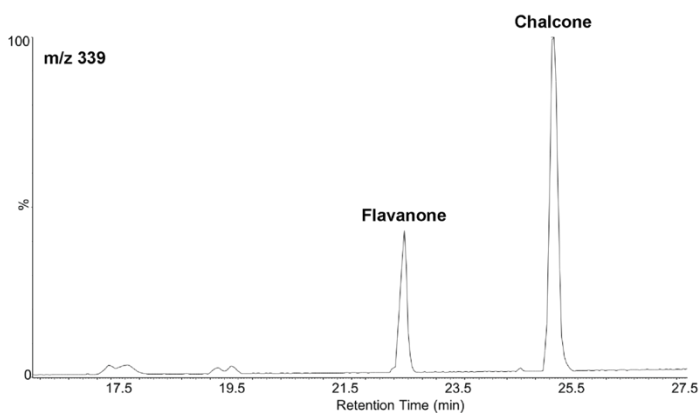

MS/MS Spectrum

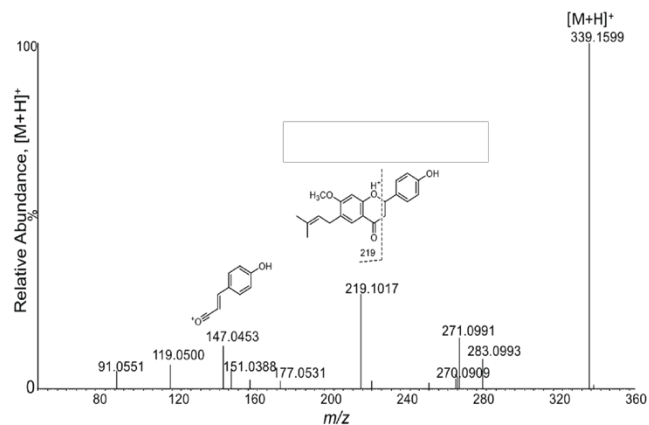

LC-MS Chromatogram (left side) and MS/MS spectrum (right side) obtained for the sample claimed to be 8-prenylapigenin. The MS/MS spectrum was taken with a CE ramp between 6-50 eV in positive ionization mode. The extracted ion chromatogram ( $m/z$  339) displayed two peaks with the exact same MS/MS spectra, thereby suggesting the presence of two isomeric forms. F = Flavanone Bavachinin, and C = Chalcone 4'-O-methylbavachalcone, or 4'-O-methylbrousochalcone B.

**Pubchem CID:** 5321765

**CAS Registry Number:** 20784-60-5

**Chemspider ID:** 4479431

**Molecular Formula:** C<sub>21</sub>H<sub>22</sub>O<sub>4</sub>

S4. Annotated <sup>1</sup>H NMR spectrum of Abyssinone II (DMSO-d<sub>6</sub>, 600 MHz)

a. Annotated <sup>1</sup>H NMR spectra

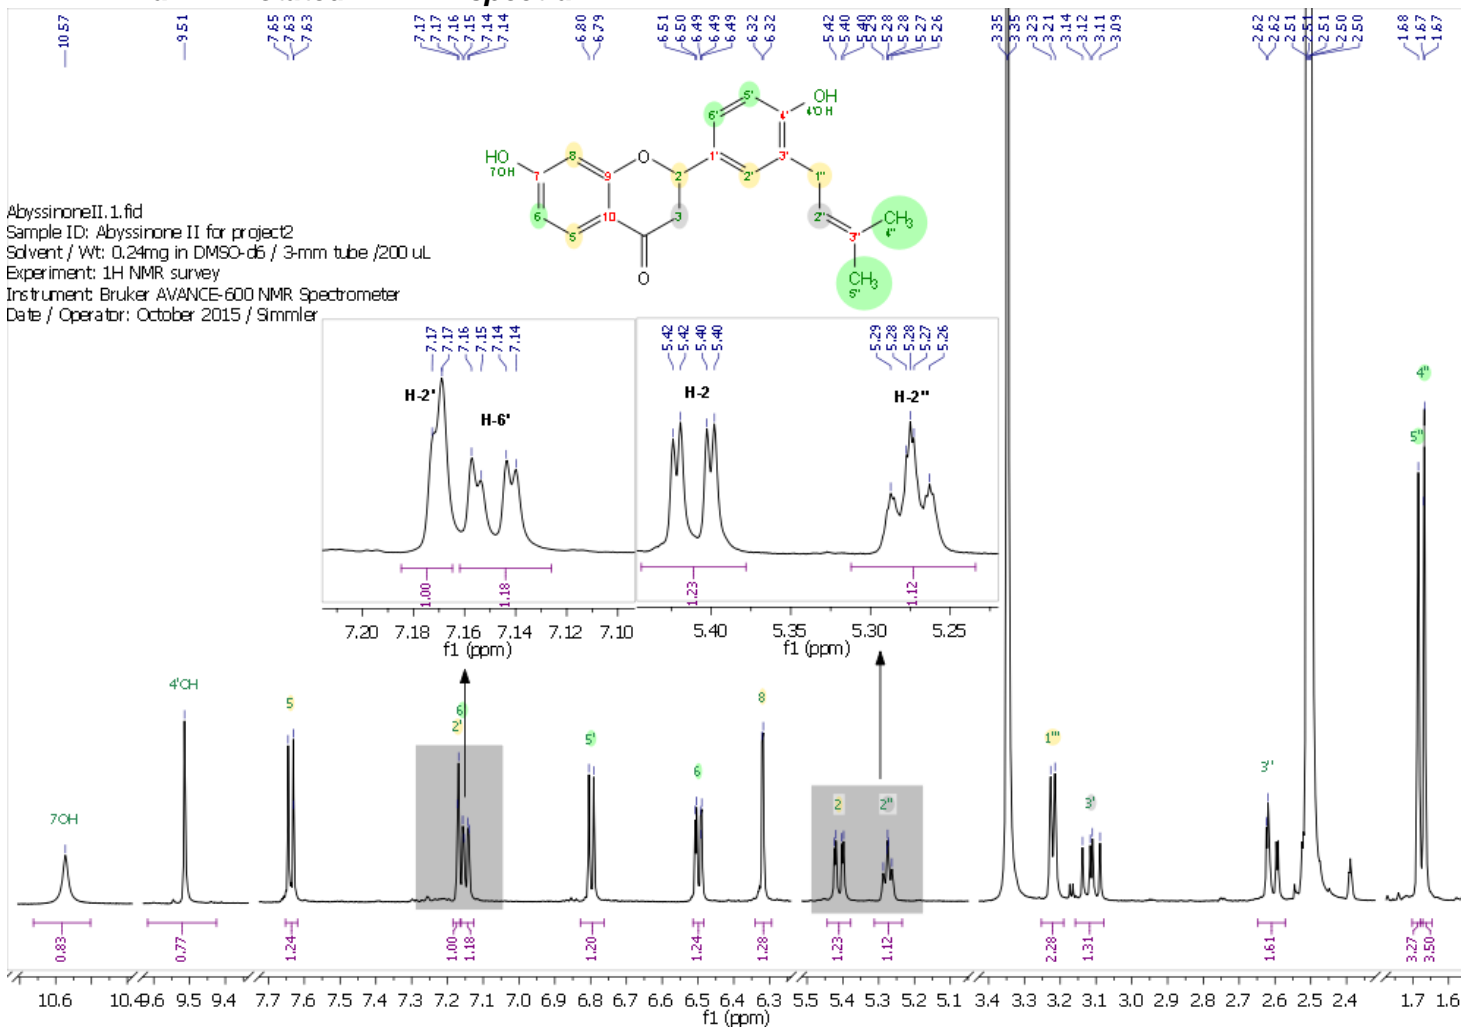

b.  $^1\text{H}$  and  $^{13}\text{C}$  NMR data (DMSO- $d_6$ , 600-225 MHz)

| Position | mult. | $\delta_{\text{H}}$ (J in Hz) in ppm                                                                                                                                                                           | $^{\text{a}}\delta_{\text{C}}$ in ppm |
|----------|-------|----------------------------------------------------------------------------------------------------------------------------------------------------------------------------------------------------------------|---------------------------------------|
| C=O      |       |                                                                                                                                                                                                                | 191.97                                |
| 2        | 1H    | 5.41 <i>dd</i> ( $J_{\text{H}2-3\text{b}}$ :12.78, $J_{\text{H}2-3\text{a}}$ :2.92)*                                                                                                                           | 79.31                                 |
| 3a       | 1H    | 2.62 <i>dd</i> ( $J_{\text{H}3\text{a}-3\text{b}}$ :-16.76, $J_{\text{H}2-3\text{a}}$ :2.92)*                                                                                                                  | 43.56                                 |
| 3b       | 1H    | 3.11 <i>dd</i> ( $J_{\text{H}3\text{a}-3\text{b}}$ :-16.76, $J_{\text{H}2-3\text{b}}$ :12.78)*                                                                                                                 |                                       |
| 5        | 1H    | 7.64, <i>d</i> ( $J_{\text{H}6-5}$ : 8.22, $J_{\text{H}5-8}$ :0.55)*                                                                                                                                           | 128.79                                |
| 6        | 1H    | 6.50, <i>dd</i> ( $J_{\text{H}6-5}$ :8.22, $J_{\text{H}8-6}$ 2.25)*                                                                                                                                            | 110.60                                |
| 7 (OH)   |       |                                                                                                                                                                                                                | 164.80                                |
| 8        | 1H    | 6.32, <i>d</i> ( $J_{\text{H}8-6}$ : 2.25, $J_{\text{H}5-8}$ :0.55)*                                                                                                                                           | 102.85                                |
| 9        |       |                                                                                                                                                                                                                | 162.29                                |
| 10       |       |                                                                                                                                                                                                                | 114.33                                |
| 1'       |       |                                                                                                                                                                                                                | $^{\text{b}}$ 129.24                  |
| 2'       | 1H    | 7.17, <i>d</i> ( $J_{\text{H}2'-6'}$ : 2.4, $J_{\text{H}5'-2'}$ : 0.21, $J_{\text{H}2'-1''\text{ab}}$ : 0.05)*                                                                                                 | 128.75                                |
| 3'       |       |                                                                                                                                                                                                                | $^{\text{b}}$ 127.47                  |
| 4' (OH)  |       |                                                                                                                                                                                                                | 156.58                                |
| 5'       | 1H    | 6.80, <i>d</i> ( $J_{\text{H}5'-6}$ :8.66, $J_{\text{H}5'-2}$ : 0.21)*                                                                                                                                         | $^{\text{b}}$ 114.64                  |
| 6'       | 1H    | 7.15, <i>dd</i> ( $J_{\text{H}5'-6}$ :8.66, $J_{\text{H}2'-6'}$ : 2.41)*                                                                                                                                       | 125.48                                |
| 1''a     | 1H    | 3.22 <i>d</i> ( $J_{\text{H}2''-1''\text{a}}$ :7.40, $J_{\text{H}1''\text{a}-4''}$ :0.70, $J_{\text{H}1''\text{a}-5''}$ :0.93, $J_{\text{H}1''\text{a}-\text{b}}$ :-18, $J_{\text{H}2''-1''\text{a}}$ : 0.05)* | 27.50                                 |
| 1''b     | 1H    | 3.22 <i>d</i> ( $J_{\text{H}2''-1''\text{b}}$ :7.16, $J_{\text{H}1''\text{b}-4''}$ :1.02, $J_{\text{H}1''\text{b}-5''}$ :0.61, $J_{\text{H}1''\text{a}-\text{b}}$ :-18, $J_{\text{H}2''-1''\text{b}}$ : 0.05)* |                                       |
| 2''      | 1H    | 5.27 <i>ddqq</i> ( $J_{\text{H}2''-1''\text{a}}$ :7.40, $J_{\text{H}2''-1''\text{b}}$ :7.16, $J_{\text{H}2''-4''}$ :-1.53, $J_{\text{H}2''-5''}$ : -1.28)*                                                     | 123.06                                |
| 3''      |       |                                                                                                                                                                                                                | 132.02                                |
| 4'' CH3  | 3H    | 1.68, <i>brs</i> ( $J_{\text{H}1''\text{a}-4''}$ :0.70, $J_{\text{H}1''\text{b}-4''}$ :1.02, $J_{\text{H}2''-4''}$ :-1.53) *                                                                                   | 26.15                                 |
| 5'' CH3  | 3H    | 1.67, <i>brs</i> ( $J_{\text{H}1''\text{a}-5''}$ :0.93, $J_{\text{H}1''\text{b}-5''}$ :0.61, $J_{\text{H}2''-5''}$ :-1.28) *                                                                                   | 18.27                                 |

\*Calculated values obtained through full spin analysis using Perch NMR software, in order to obtain the exact coupling constants.

Nd=- not detected

$^{\text{a}}$ Determined from HMBC/HSQC data,  $^{\text{b}}$  $^{13}\text{C}$  at 225 MHz

S5. Annotated <sup>1</sup>H NMR spectrum of licochalcone C (DMSO-d<sub>6</sub>, 600 MHz)

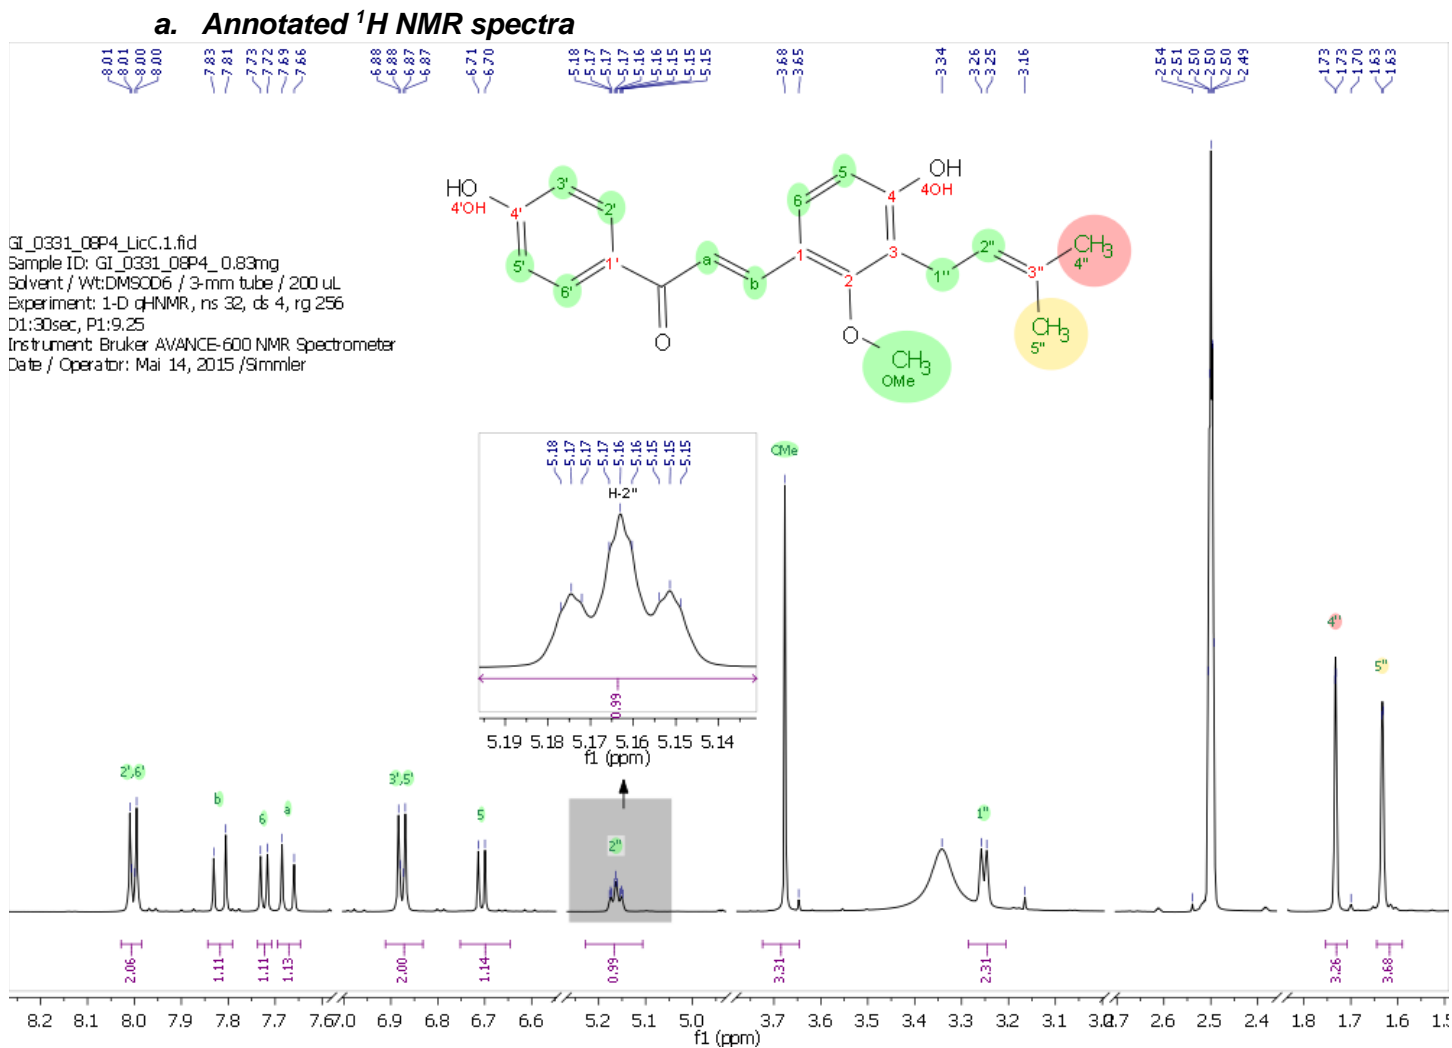

b.  $^1\text{H}$  and  $^{13}\text{C}$  NMR data (DMSO- $d_6$ , 600-225 MHz)

| Position   | mult. | $\delta_{\text{H}}$ in ppm ( $J$ in Hz)                                                                    | $^{\text{a}}\delta_{\text{C}}$ in ppm |
|------------|-------|------------------------------------------------------------------------------------------------------------|---------------------------------------|
| C=O        |       |                                                                                                            | $^{\text{b}}187.28$                   |
| 1          |       |                                                                                                            | 118.99                                |
| 2 (-OMe)   |       |                                                                                                            | 158.31                                |
| 3          |       |                                                                                                            | $^{\text{b}}121.51$                   |
| 4 (-OH)    |       |                                                                                                            | 159.89                                |
| 5          |       | 6.71, $d$ ( $J_{\text{H}5-6}$ : 8.58)                                                                      | 112.32                                |
| 6          | 1H    | 7.72, $d$ ( $J_{\text{H}5-6}$ : 8.58)                                                                      | 127.35                                |
| 2', 6'     | 2H    | 8.00, AA' type ( $J_{\text{H}2'/6'-\text{H}3'/5'}$ : 8.55/0.37, $J_{\text{H}2'/6'-\text{H}2'/6'}$ : 2.19)* | 131.45                                |
| 5', 3'     | 2H    | 6.88, XX' type ( $J_{\text{H}2'/6'-\text{H}3'/5'}$ : 8.55/0.37, $J_{\text{H}3'/5'-\text{H}3'/5'}$ : 2.26)* | 115.80                                |
| 1'         |       |                                                                                                            | 129.46                                |
| 4'(-OH)    |       |                                                                                                            | 162.07                                |
| $\alpha$   | 1H    | 7.67, $d$ ( $J_{\text{H}\alpha-\beta}$ 15.56)*                                                             | 119.71                                |
| $\beta$    | 1H    | 7.82, $d$ ( $J_{\text{H}\alpha-\beta}$ 15.56)*                                                             | 138.64                                |
| 1''        | 2H    | 3.25, $d$ ( $J_{\text{H}2''-1''}$ : 7.04, $J_{\text{H}1''-4''}$ : 1.36, $J_{\text{H}1''-5''}$ : -1.36)*    | 22.88                                 |
| 2''        | 1H    | 5.16 $ddq$ ( $J_{\text{H}2''-1''}$ : 7.04, $J_{\text{H}2''-4''}$ : 0.84, $J_{\text{H}2''-5''}$ : -1.34)*   | 123.53                                |
| 3''        |       |                                                                                                            | 130.51                                |
| -CH3 (4'') | 3H    | 1.63, $brs$ ( $J_{\text{H}1''-4''}$ : 1.37, $J_{\text{H}2''-4''}$ : -0.84) *                               | 26.11                                 |
| -CH3 (5'') | 3H    | 1.73, $brs$ ( $J_{\text{H}1''-5''}$ : -1.36, $J_{\text{H}2''-5''}$ : -1.34) *                              | 18.06                                 |
| O-CH3      | 3H    | 3.68 s                                                                                                     | 62.35                                 |

\*Calculated values obtained through full spin analysis using Perch NMR software, in order to obtain the exact coupling constants.

Nd= not detected

$^{\text{a}}$ Determined from HMBC/HSQC data,  $^{\text{b}}$  $^{13}\text{C}$  at 225 MHz
